# Supplementary material for: An efficient calcium-based sorbent for flue gas dry-desulfurization: promotion roles of nitrogen oxide and oxygen
Source: Royal Society of Chemistry journal article supplement (doi:10.1039/d2ra05769g), 2023-01-01
Supplement: d2ra05769g1.pdf [file d2ra05769g1.pdf]

## Supporting Information

### An Efficient Calcium-based Sorbent for Flue Gas Dry-Desulfurization:

### Promotion roles of Nitrogen Oxide and Oxygen

Kai-Qi Wang<sup>a</sup>, Xian-Ming Gao<sup>b</sup>, Bo Lin<sup>a\*</sup>, Dong-Xu Hua<sup>b</sup>, Yong Yan<sup>a</sup>, Hong-Yan Zhao<sup>b</sup> and Wen-De Xiao<sup>a\*</sup>

<sup>a</sup> School of Chemistry and Chemical Engineering, Shanghai Jiao Tong University, Shanghai 200240, P.R. China

<sup>b</sup> Henan Shenma Nylon Chemical Company, Ltd., Henan 467013, P.R. China

**Table S1** The composition and content of sorbents

| Sorbent | Mass Ratio<br>Fly ash/CaO/CaSO <sub>4</sub> | Fly ash (g) | CaO (g) | CaSO <sub>4</sub> (g) |
|---------|---------------------------------------------|-------------|---------|-----------------------|
| ACS-1   | 2:1:1                                       | 25          | 12.5    | 12.5                  |
| ACS-2   | 1:1:2                                       | 12.5        | 12.5    | 25                    |
| ACS-3   | 1:1:1                                       | 12.5        | 12.5    | 12.5                  |
| ACS-4   | 1:2:1                                       | 6.25        | 12.5    | 6.25                  |
| ACS-5   | 1:3:1                                       | 4.2         | 12.5    | 4.2                   |

**Table S2** Major chemical composition of fly ash (wt%)

| SiO <sub>2</sub> | Al <sub>2</sub> O <sub>3</sub> | CaO  | Fe <sub>2</sub> O <sub>3</sub> | K <sub>2</sub> O | MgO  | Na <sub>2</sub> O |
|------------------|--------------------------------|------|--------------------------------|------------------|------|-------------------|
| 48.49            | 36.14                          | 2.35 | 5.71                           | 1.71             | 1.53 | 1.37              |

**Fig. S1.** Nitrogen adsorption-desorption isotherms and pore-size distributions of ACS sorbents.

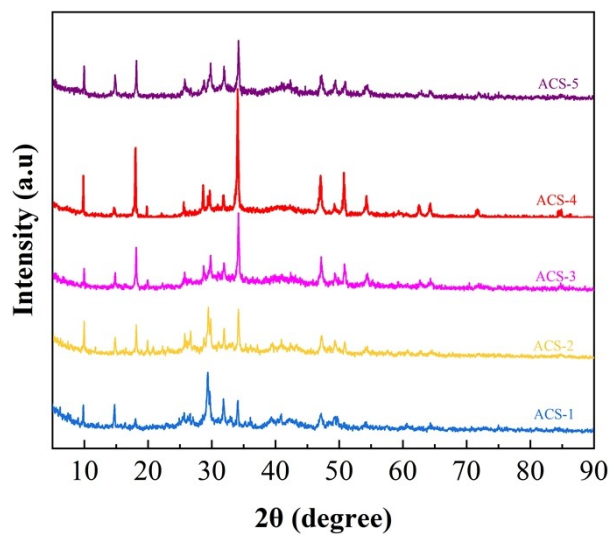

**Fig. S2.** XRD patterns of the as-synthesized sorbents.

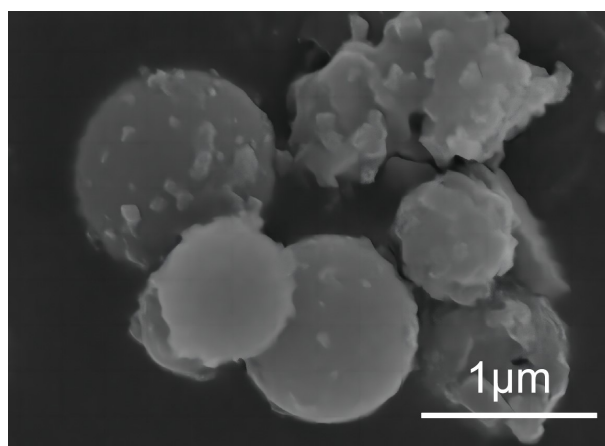

**Fig. S3.** The fly ash morphology characterized by SEM

**Fig. S4.** The fresh ACS morphology characterized by SEM (a) ACS-1; (b) ACS-2; (c) ACS-3; (d) ACS-5.

**Fig.S5.** TGA curves of the different sorbents (a) ACS-1; (b) ACS-2; (c) ACS-3; (d) ACS-4;  
(e) ACS-5. ( $20\text{ }^{\circ}\text{C min}^{-1}$  under nitrogen)
